# Supplementary material for: High-resolution regional climate modeling and projection over western Canada using a weather research forecasting model with a pseudo-global warming approach
Source: Copernicus journal article supplement (doi:10.5194/hess-23-4635-2019), 2019-11-18
Supplement: Supplementary file 1 [file hess-23-4635-2019-supplement.pdf]

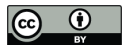

## *Supplement of*

# **High-resolution regional climate modeling and projection over western Canada using a weather research forecasting model with a pseudo-global warming approach**

**Yanping Li et al.**

*Correspondence to:* Yanping Li ([yanping.li@usask.ca](mailto:yanping.li@usask.ca)) and Zhenhua Li ([zhenhua.li@usask.ca](mailto:zhenhua.li@usask.ca))

The copyright of individual parts of the supplement might differ from the CC BY 4.0 License.

Supplementary

10

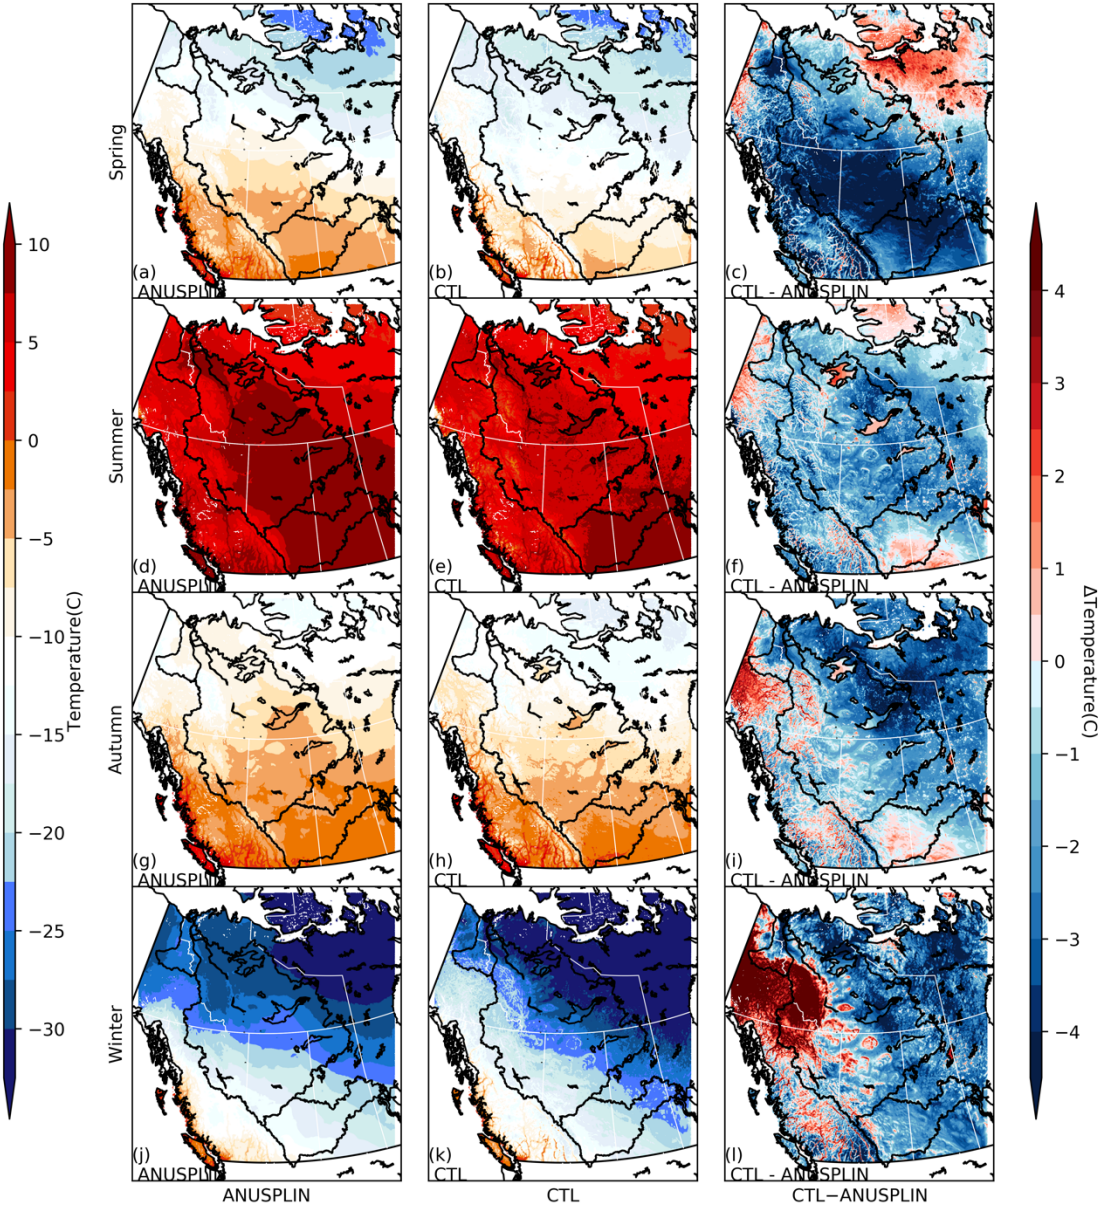

Figure S1: The seasonal averaged daily minimum temperature in spring (MAM, 1<sup>st</sup> row), summer (JJA, 2<sup>nd</sup> row), and autumn (SON, 3<sup>rd</sup> row), and winter (DJF, 4<sup>th</sup> row) from ANUSPLIN (left column) and WRF-CTL (middle column) and the difference (CTL - ANUSPLIN, right column).

15

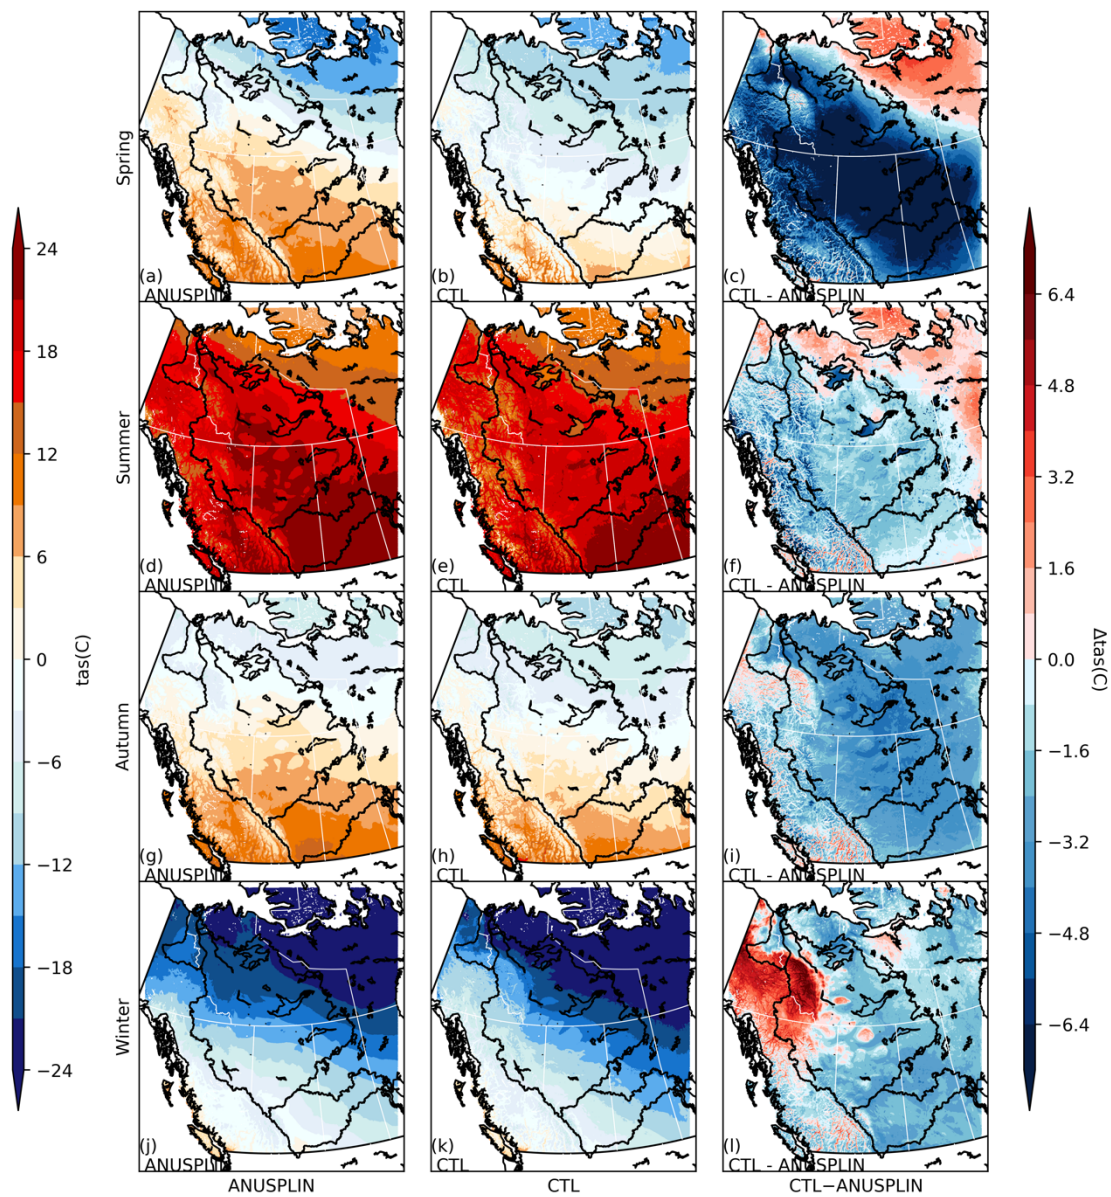

**Figure S2: The seasonal averaged daily maximum temperature in spring (MAM, 1<sup>st</sup> row), summer (JJA, 2<sup>nd</sup> row), and autumn (SON, 3<sup>rd</sup> row), and winter (DJF, 4<sup>th</sup> row) from ANUSPLIN (left column) and WRF-CTL (middle column) and the difference (CTL - ANUSPLIN, right column)**



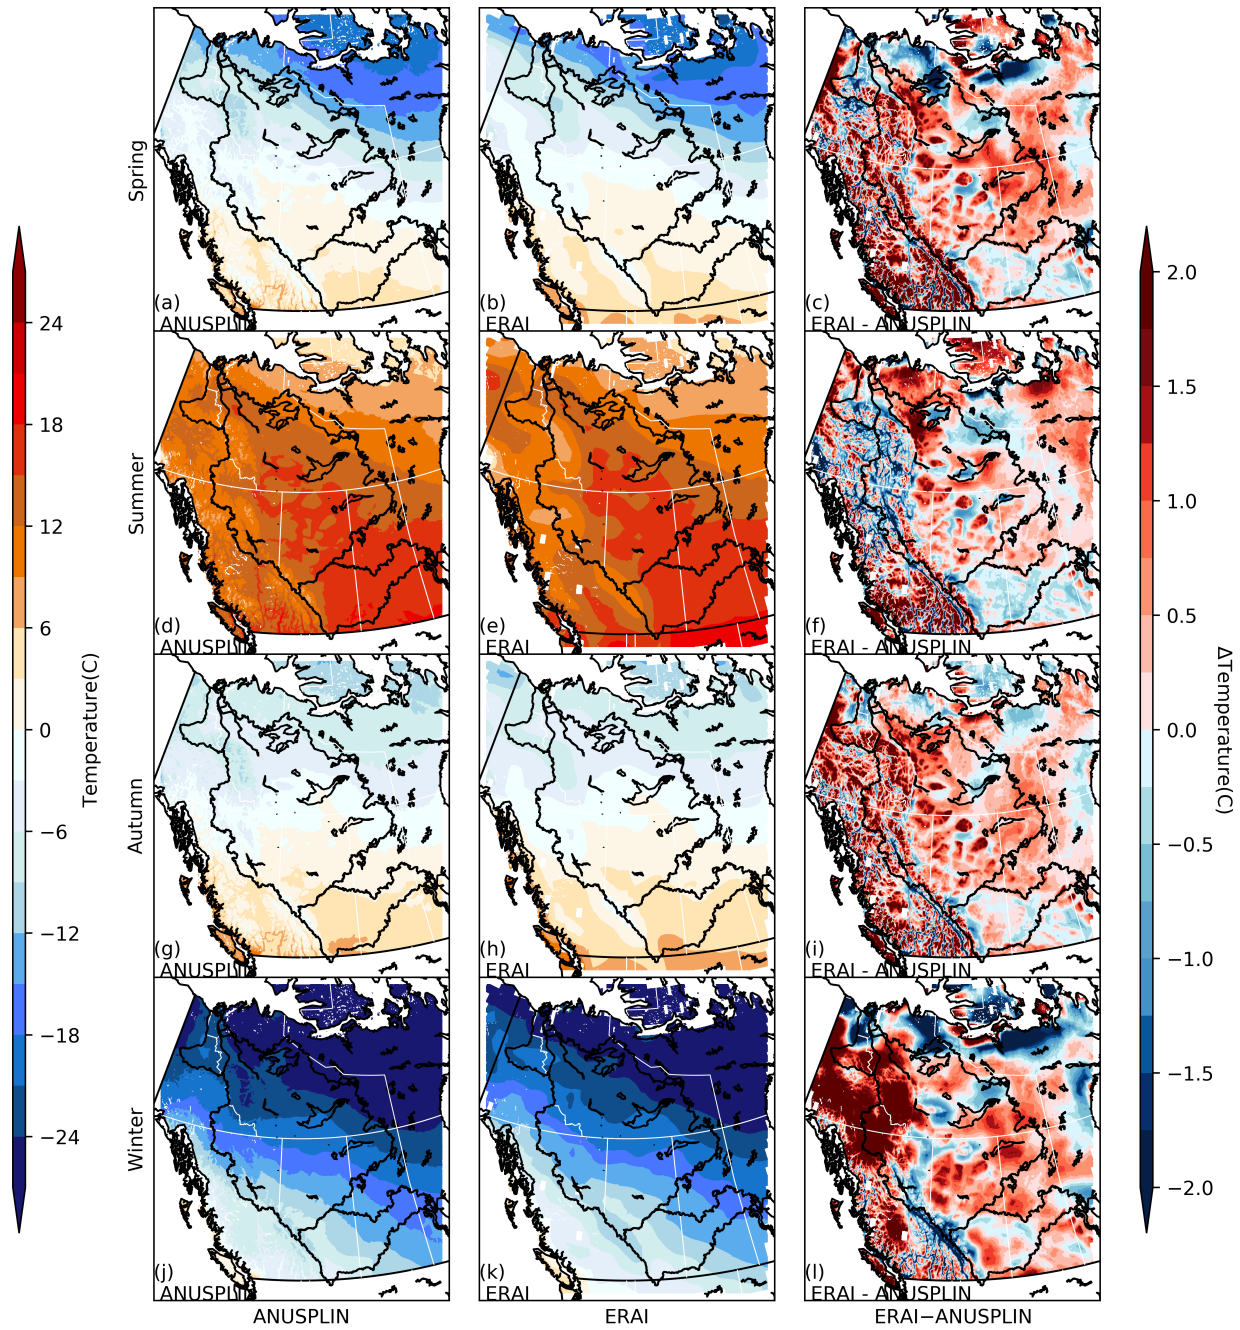

**Figure S3: The seasonal averaged daily temperature in spring (MAM, 1<sup>st</sup> row), summer (JJA, 2<sup>nd</sup> row), and autumn (SON, 3<sup>rd</sup> row), and winter (DJF, 4<sup>th</sup> row) from ANUSPLIN (left column) and ERA-Interim (middle column) and the difference (ERAI - ANUSPLIN, right column)**



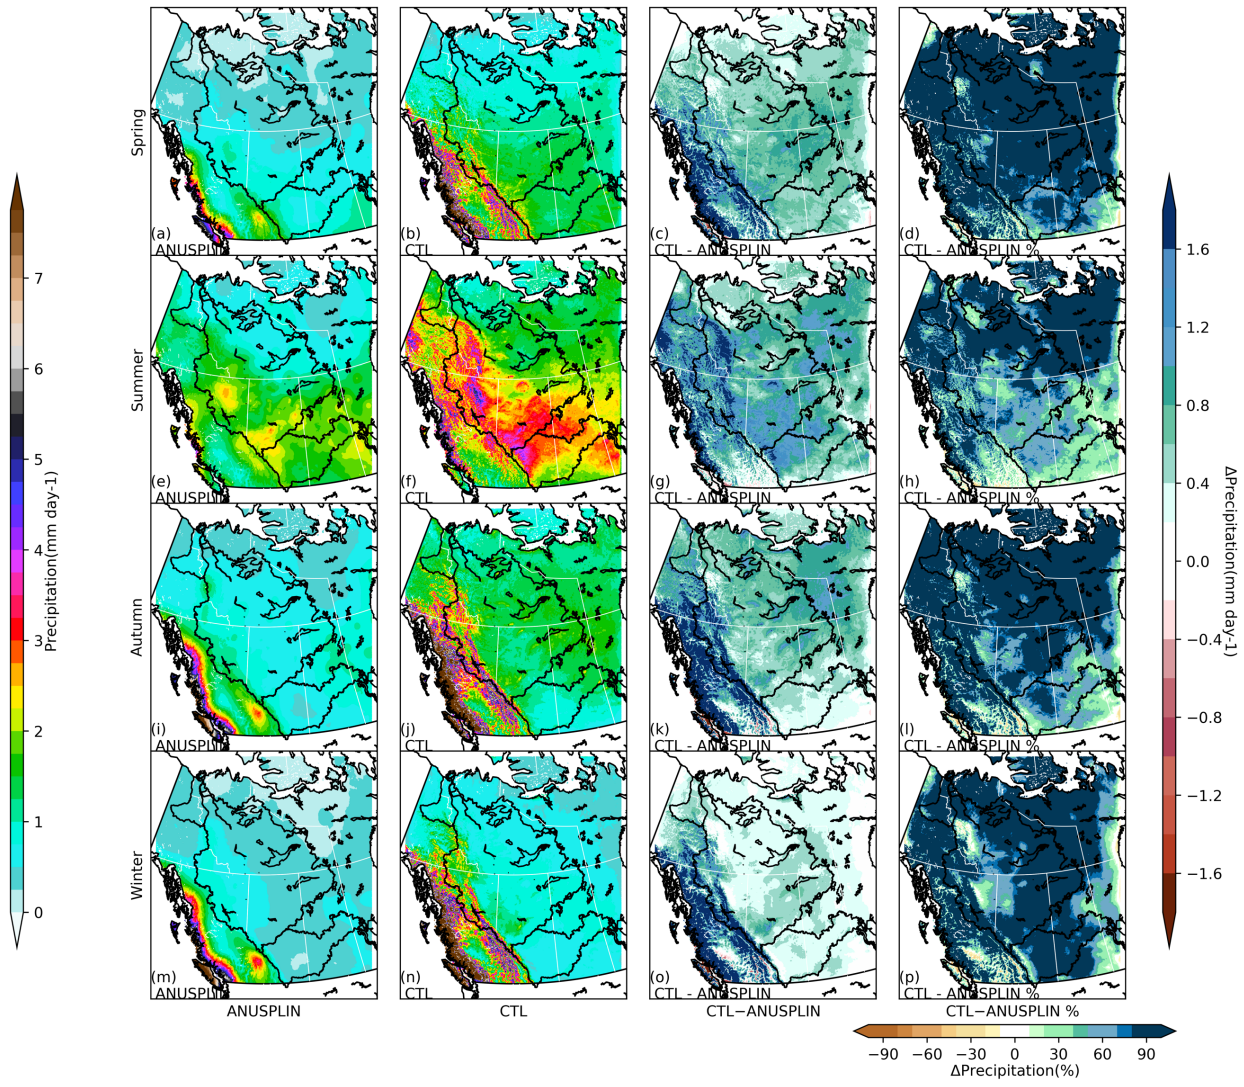

**Figure S4: The daily mean precipitation in spring (MAM, 1<sup>st</sup> row), summer (JJA, 2<sup>nd</sup> row), and autumn (SON, 3<sup>rd</sup> row), and winter (DJF, 4<sup>th</sup> row) from ANUSPLIN (1st column) and WRF-CTL(2nd column), and their absolute (3rd column) and relative differences in percentage (4th column).**

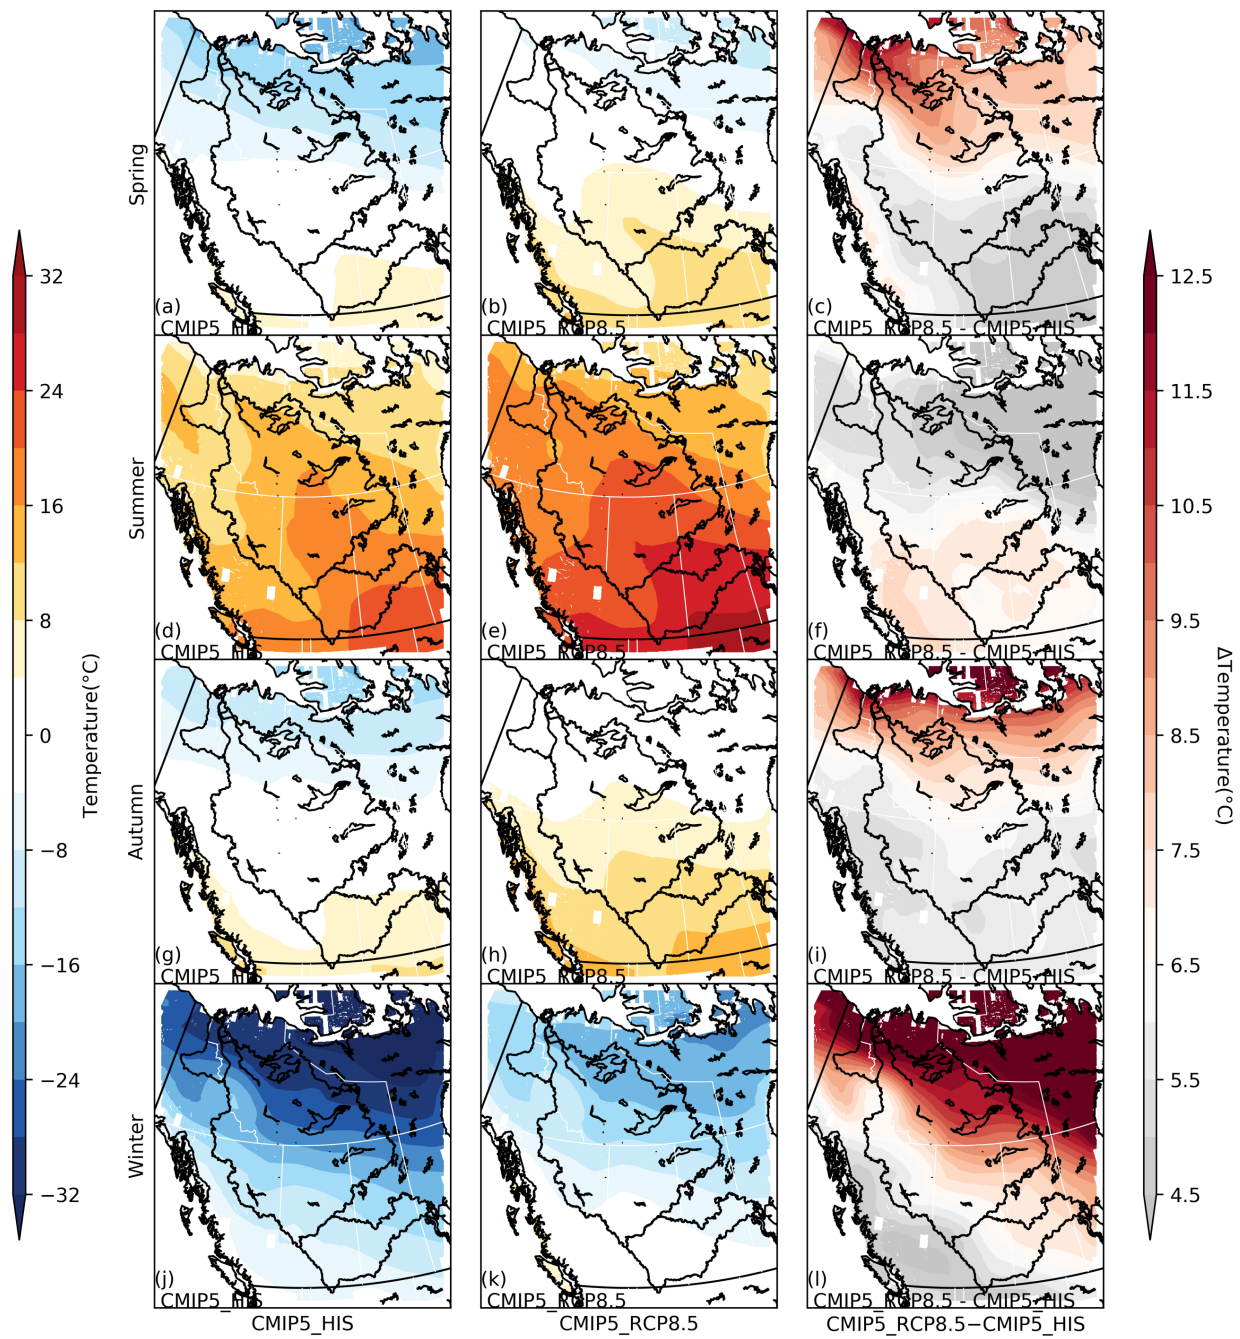

**Figure S5:** The daily mean temperature in spring (MAM, 1<sup>st</sup> row), summer (JJA, 2<sup>nd</sup> row), and autumn (SON, 3<sup>rd</sup> row), and winter (DJF, 4<sup>th</sup> row) from CMIP5 ensemble 1976-2005 (1st column), CMIP5 RCP8.5 ensemble 2071-2100 (2nd column) and the difference (CMIP5\_RCP8.5- CMIP5\_HIS, 3rd column).

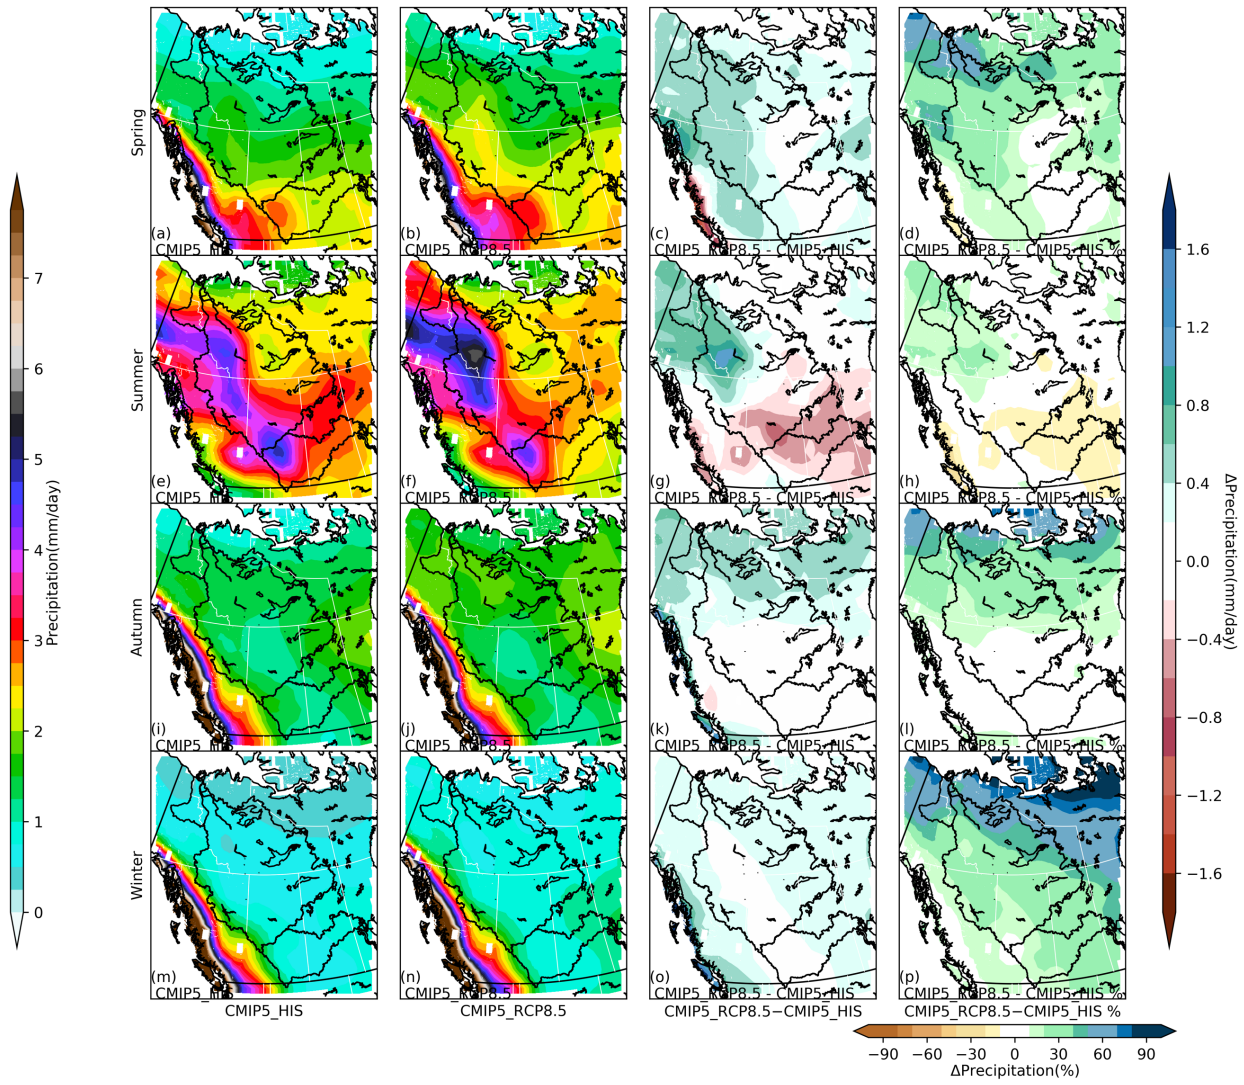

**Figure S6:** The daily mean precipitation in spring (MAM, 1<sup>st</sup> row), summer (JJA, 2<sup>nd</sup> row), and autumn (SON, 3<sup>rd</sup> row), and winter (DJF, 4<sup>th</sup> row) from CMIP5 ensemble 1976-2005 (1st column), CMIP5 RCP8.5 ensemble 2071-2100 (2nd column) and the difference (CMIP5\_RCP8.5 - CMIP5\_HIS, 3rd column) and percentage difference (4<sup>th</sup> column).
